1                                   **How hot is the hot zone? Computational modelling**  
2                                   **clarifies the role of parietal and frontoparietal**  
3                                   **connectivity during anaesthetic-induced loss of**  
4                                   **consciousness**

5  
6                                   Riku Ihalainen<sup>1\*</sup>, Olivia Gosseries<sup>2</sup>, Frederik Van de Steen<sup>3</sup>, Federico  
7                                   Raimondo<sup>2,4</sup>, Rajanikant Panda<sup>2</sup>, Vincent Bonhomme<sup>5,6</sup>, Daniele Marinazzo<sup>3</sup>,  
8                                   Howard Bowman<sup>1,7</sup>, Steven Laureys<sup>2†</sup>, Srivas Chennu<sup>1,8†</sup>

9  
10                                   <sup>1</sup> School of Computing, University of Kent, United Kingdom

11                                   <sup>2</sup> Coma Science Group, GIGA Consciousness, University and University  
12                                   Hospital of Liège, Liège, Belgium

13                                   <sup>3</sup> Department of Data Analysis, Faculty of Psychology and Educational  
14                                   Sciences, Ghent University, Belgium

15                                   <sup>4</sup> Institut du Cerveau et de la Moelle épinière, Paris, France.

16                                   <sup>5</sup> GIGA - Consciousness, Anesthesia and Intensive Care Medicine  
17                                   Laboratory, University and CHU University Hospital of Liège, Liège,  
18                                   Belgium

19                                   <sup>6</sup> University Department of Anesthesia and Intensive Care Medicine, CHR  
20                                   Citadelle and CHU Liege, Liège, Belgium

21                                   <sup>7</sup> School of Psychology, University of Birmingham, United Kingdom

22                                   <sup>8</sup> Department of Clinical Neurosciences, University of Cambridge, United  
23                                   Kingdom

24  
25                                   \* Corresponding author

26                                   Riku Ihalainen – [rji4@kent.ac.uk](mailto:rji4@kent.ac.uk)

27                                   Medway Building, University of Kent  
28                                   Chatham Maritime  
29                                   Kent, ME4 4AG

30                                   † Both authors contributed equally

31

32

33

34 **Highlights**

- 35 • Modelling shows that connectivity within hot zone tracks change of
- 36 conscious state
- 37 • Separately, frontoparietal connections support maintenance of conscious
- 38 state
- 39 • Strength of frontoparietal connections predicts conscious state in unseen
- 40 data
- 41 • Both parietal hot zone and frontoparietal connectivity important for
- 42 consciousness

43

44

**Abstract**

45

46

47

48

49

50

51

52

53

54

55

56

57

58

In recent years, specific cortical networks have been proposed to be crucial for sustaining consciousness, including the posterior hot zone and frontoparietal resting state networks (RSN). Here, we computationally evaluate the relative contributions of three RSNs – the default mode network (DMN), the salience network (SAL), and the central executive network (CEN) – to consciousness and its loss during propofol anaesthesia. Specifically, we use dynamic causal modelling (DCM) of 10 minutes of high-density EEG recordings ( $N = 10$ , 4 males) obtained during behavioural responsiveness, unconsciousness and post-anaesthetic recovery to characterise differences in effective connectivity within frontal areas, the posterior “hot zone”, frontoparietal connections, and between-RSN connections. We estimate – for the first time – a large DCM model (LAR) of resting EEG, combining the three RSNs into a rich club of interconnectivity. Consistent with the hot zone theory, our findings demonstrate reductions in inter-RSN connectivity in the parietal

59 cortex. Within the DMN itself, the strongest reductions are in feed-forward  
60 frontoparietal and parietal connections at the precuneus node. Within the SAL  
61 and CEN, loss of consciousness generates small increases in bidirectional  
62 connectivity. Using novel DCM leave-one-out cross-validation, we show that  
63 the most consistent out-of-sample predictions of the state of consciousness  
64 come from a key set of frontoparietal connections. This finding also generalises  
65 to unseen data collected during post-anaesthetic recovery. Our findings provide  
66 new, computational evidence for the importance of the posterior hot zone in  
67 explaining the loss of consciousness, highlighting also the distinct role of  
68 frontoparietal connectivity in underpinning conscious responsiveness, and  
69 consequently, suggest a dissociation between the mechanisms most prominently  
70 associated with explaining the contrast between conscious awareness and  
71 unconsciousness, and those maintaining consciousness.

72

73 **Keywords:** Anesthesia; Consciousness; EEG; Effective connectivity;

74 Dynamic causal modeling

75

### 76 **Acknowledgements**

77 We gratefully acknowledge support from the University of Kent's High

78 Performance Computing facility.

79

### 80 **Funding**

81 This work was supported by the UK Engineering and Physical Sciences

82 Research Council (EP/P033199/1), Belgian National Funds for Scientific

83 Research (FRS-FNRS), the University and University Hospital of Liege, the

84 Fund Generet, the King Baudouin Foundation, the AstraZeneca Foundation,  
85 the European Union’s Horizon 2020 Framework Programme for Research and  
86 Innovation under the Specific Grant Agreement No. 945539 (Human Brain  
87 Project SGA3), DOCMA project (EU-H2020-MSCA–RISE–778234), the  
88 BIAL Foundation, the European Space Agency (ESA) and the Belgian  
89 Federal Science Policy Office (BELSPO) in the framework of the PRODEX  
90 Programme, the Center-TBI project (FP7-HEALTH- 602150), the Public  
91 Utility Foundation ‘Université Européenne du Travail’, “Fondazione Europea  
92 di Ricerca Biomedica”, the Mind Science Foundation, the European  
93 Commission, and the Special Research Fund of Ghent University. O.G. is  
94 research associate and S.L. is research director at the F.R.S-FNRS.

95

96 **Declaration of interest:**

97 None.

98

99 **Significance Statement:**

100 Various connectivity studies have suggested multiple network-level  
101 mechanisms driving changes in the state of consciousness, such as the posterior  
102 hot zone, frontal-, and large-scale frontoparietal networks. Here, we  
103 computationally evaluate evidence for these mechanisms using dynamic causal  
104 modeling for resting EEG recorded before and during propofol-anaesthesia, and  
105 demonstrate that, particularly, connectivity in the posterior hot zone is impaired  
106 during propofol-induced unconsciousness. With a robust cross-validation  
107 paradigm, we show that connectivity in the large-scale frontoparietal networks  
108 can consistently predict the state of consciousness and further generalise these  
109 findings to an unseen state of recovery. These results suggest a dissociation  
110 between the mechanisms most prominently associated with explaining the  
111 contrast between conscious awareness and unconsciousness, and those  
112 maintaining consciousness.

113 **How hot is the hot zone? Computational modelling**  
114 **clarifies the role of parietal and frontoparietal**  
115 **connectivity during anaesthetic-induced loss of**  
116 **consciousness**

117

118 **1. Introduction**

119 Several cortical network-level mechanisms have been proposed to  
120 explain human consciousness and its loss, of which two, in particular, have  
121 received an increasing amount of interest and evidence. On the one hand,  
122 empirical studies have suggested that the loss of consciousness (LOC)<sup>1</sup> is  
123 associated with disruptions of within- and between-network connectivity in  
124 cortical areas associated with large-scale frontoparietal networks (Bor & Seth,  
125 2012; Laureys & Schiff, 2012). On the other, temporo-parieto-occipital areas –  
126 colloquially named as ‘the posterior hot zone’ – has been shown to be important  
127 in mediating changes in consciousness during sleep (Siclari et al., 2017; Lee et  
128 al., 2019), and in patients with brain damage (Vanhaudenhuyse et al., 2010; Wu  
129 et al., 2015).

<sup>1</sup> We acknowledge that anaesthetic-induced loss of consciousness (LOC) may actually be anaesthetic-induced loss of behavioural responsiveness (LOBR), as e.g. volitional mental imagery or dreaming may take place during the anaesthetic state. The participants were, however, asked afterwards if they had any recall of dreams etc., which they did not report. Thus, here, we follow the typical convention in anaesthesia-literature and refer to this state as LOC.

130                   In this context, general anaesthetics are a powerful tool to investigate  
131 alterations in brain connectivity during changes in the state of consciousness  
132 (see Bonhomme et al., 2019 for a recent review). Indeed, several previous  
133 studies have utilised anaesthetic drugs in investigating brain dynamics in both  
134 functional and effective/directed connectivity studies and suggested multiple  
135 explanatory mechanisms of the LOC. Note that here, effective connectivity is  
136 defined following (Friston, 2011) and (Razi & Friston, 2016) as a causal  
137 influence (in a control theory sense) of one neural population over another and  
138 functional connectivity as undirected statistical dependencies between distinct  
139 neurophysiological events. Some of these studies have suggested a breakdown  
140 of thalamo-cortical connections and disrupted frontoparietal networks  
141 (Boveroux et al., 2010; Schrouff et al., 2011). Others have found disruptions in  
142 frontal areas (Guldenmund et al., 2016), diminished frontoparietal feedback  
143 connectivity (Lee et al., 2009; Lee, Ku et al., 2015), and increased frontoparietal  
144 connectivity (Barrett et al., 2012). To bring computational evidence to bear  
145 upon this discussion, we adopt one of the most commonly used methods for  
146 understanding effective connectivity, dynamic causal modeling (DCM; Friston,  
147 Harrison & Penny, 2003), to assess cortical network-level mechanisms involved  
148 in the LOC, and evaluate the evidence for the posterior hot zone.

149                   There are relatively few studies assessing resting state effective  
150 connectivity with DCM during anaesthetic-induced unconsciousness, but a  
151 recent fMRI study identified impaired subcortico-cortical connectivity between  
152 globus pallidus and posterior cingulate (PCC) nodes, but no cortico-cortical  
153 modulations (Crone, Lutkenhoff, Bio, Laureys, & Monti, 2017). Boly et al.  
154 (2012) found a decrease in feedback connectivity from frontal (dorsal anterior

155 cingulate; dACC) to parietal (PCC) nodes. Both of these studies, however,  
156 evaluated relatively simple models in terms of cortical sources (excluding  
157 subcortical nodes), consisting of only two such nodes – an anterior and a  
158 posterior node. Consequently, they do not allow us to compare the role of the  
159 posterior hot zone to other potential cortical mechanisms underpinning  
160 consciousness.

161 Here, we address this gap by modelling changes in key resting state  
162 networks (RSN) - the default mode network (DMN), the salience network  
163 (SAL), and the central executive network (CEN), due to unconsciousness  
164 induced by propofol, a common clinical anaesthetic. We employ a novel  
165 methodological combination of DCM for resting EEG cross-spectral densities  
166 (CSD; Friston et al., 2012; Moran et al., 2009) and Parametric Empirical Bayes  
167 (PEB; Friston et al., 2016), to better estimate model parameters (and their  
168 distributions) and prune redundant connections. Within this framework, we  
169 invert - for the first time - a single large-scale model of EEG, consisting of 14  
170 RSN nodes, in addition to the individual RSNs themselves (figure 1). This  
171 allows us to evaluate the role of different subgroups of intra- and inter-RSN  
172 connections in the modulation of consciousness. Further, we apply robust leave-  
173 one-subject-out-cross-validation (LOSOCV) on DCM model parameters, to  
174 evaluate hypotheses about whether specific sets of connections within and  
175 between frontal and parietal nodes are not only able to explain changes between  
176 states of consciousness, but also to predict the state of consciousness from  
177 unseen EEG data. Using this combination of computational modelling, cross-  
178 validation and hypothesis testing, we indicate the importance of the posterior  
179 hot zone in explaining the loss of consciousness, while highlighting also the



180 distinct role of frontoparietal connectivity in underpinning conscious  
181 responsiveness. Consequently, we demonstrate a dissociation between the  
182 mechanisms most prominently associated with explaining the contrast between  
183 conscious awareness and unconsciousness, and those maintaining  
184 consciousness.

185

## 186 **2. Methods**

187

### 188 **2.1 Data acquisition and preprocessing**

189 The data used in the present work were acquired from a previous  
190 propofol anaesthesia study, which describes the experimental design and data  
191 collection procedure in detail (Murphy et al., 2011). The study was approved by  
192 the Ethics Committee of the Faculty of Medicine of the University of Liège, and  
193 written consent was obtained from all the participants. None of the participants  
194 suffered from mental illness, drug addiction, asthma, motion sickness, nor had  
195 a history of mental illness or suffered from any previous problems with  
196 anaesthesia. The data consisted of 15 minutes of spontaneous, eyes-closed high-  
197 density EEG recordings (256 channels, EGI) from 10 participants (mean age 22  
198  $\pm$  2 years, 4 males) in four different states of consciousness: behavioural  
199 responsiveness, sedation (Ramsay scale score 3, slower responses to command),  
200 loss of consciousness with clinical unconsciousness (Ramsay scale score 5-6,  
201 no response to command), and recovery of consciousness (Ramsay, Savege,  
202 Simpson, & Goodwin, 1974). Note that for the recovery state, the data consisted  
203 of 9 datasets. Participants were considered to be fully awake if the response to

204 verbal command ('squeeze my hand') was clear and strong (Ramsay 2), and in  
205 LOC, if there was no response (Ramsay 5-6). The Ramsay scale verbal  
206 commands were repeated twice at each level of consciousness. Propofol was  
207 infused through an intravenous catheter placed into a vein of the right hand or  
208 forearm, and the propofol plasma and effect-site concentrations were estimated  
209 with  $3.87 \pm 1.39$  mcg/mL average arterial blood concentration of propofol for  
210 LOC. Here, we only modelled data from the maximally different anaesthetic  
211 states, behavioural responsiveness and LOC, and used recovery as a test of  
212 DCM model generalisation. These data can be made available after signing a  
213 formal data-sharing agreement with the University of Liège.

214 Data from channels from the neck, cheeks, and forehead were discarded  
215 as they contributed most of the movement-related noise, leaving 173 channels  
216 on the scalp for the analysis. These 173 electrodes were co-registered to a  
217 template MRI mesh in MNI coordinates, and the volume conduction model of  
218 the head was based on the Boundary Element Method (BEM). The raw EEG  
219 signals were filtered from 0.5 – 45 Hz with additional line noise removal at 50  
220 Hz using a notch filter. The recordings were then downsampled to 250 Hz, and  
221 abnormally noisy channels and epochs were identified by calculating their  
222 normalised variance, and then manually rejected or retained by visual  
223 inspection. Last, the data were then re-referenced using the average reference.

224

## 225 **2.2 Dynamic causal modeling**

226 For the DCM modelling of the high-density EEG data, the first 60  
227 artefact-free 10-second epochs in wakeful behavioural responsiveness and LOC

228 were combined into one dataset with two anaesthetic states making up a total of  
229 120 epochs per participant. The preprocessed data was imported in to SPM12  
230 (Wellcome Trust Centre for Human Neuroimaging;  
231 [www.fil.ion.ucl.ac.uk/spm/software/spm12](http://www.fil.ion.ucl.ac.uk/spm/software/spm12)).

232 To analyse effective connectivity within the brain's resting state  
233 networks, DCM for EEG cross-spectral densities (CSD) was applied (Friston et  
234 al., 2012; Moran et al., 2009). Briefly, with this method, the observed cross-  
235 spectral densities in the EEG data are explained by a generative model that  
236 combines a biologically plausible neural mass model with an  
237 electrophysiological forward model mapping the underlying neural states to the  
238 observed data. Each node in the proposed DCM models – that is, each  
239 electromagnetic source – consists of three neural subpopulations, each loosely  
240 associated with a specific cortical layer; pyramidal cells, inhibitory interneurons  
241 and spiny stellate cells (ERP model; Moran, Pinotsis & Friston, 2013). DCM  
242 does not simply estimate the activity at a particular source at a particular point  
243 in time – instead, the idea is to model the source activity over time, in terms of  
244 interacting inhibitory and excitatory populations of neurons.<sup>2</sup>

245 The subpopulations within each node are connected to each other via  
246 *intrinsic* connections, while nodes are connected to each other via *extrinsic*  
247 connections. Three types of extrinsic connections are defined, each differing in  
248 terms of their origin and target layers/subpopulation: forward connections

<sup>2</sup> Here, despite using propofol-anaesthesia to modulate the state of consciousness, our aim was to specifically model consciousness, rather than anaesthesia, and to produce results comparable with previous DCM EEG work with propofol. Thus, we chose the neural mass model according to our aims rather than using neuronal models designed to capture the subtleties of anaesthesia from the EEG spectrum (see, for example, Bojak & Liley, 2005; Hutt & Longtin, 2010).

249 targeting spiny stellate cells in the granular layer, backward connections  
250 targeting pyramidal cells and inhibitory interneurons in both supra- and  
251 infragranular layers, and lateral connections targeting all subpopulations. This  
252 laminar specificity in the extrinsic cortical connections partly defines the  
253 hierarchical organisation in the brain. Generally speaking, the backward  
254 connections are thought to have more inhibitory and largely modulatory effect  
255 in the nodes they target (top-down connections), while forward connections are  
256 viewed as having a strong driving effect (bottom-up; Salin & Bullier, 1995;  
257 Sherman & Guillery, 1998).

258           The dynamics of hidden states in each node are described by second-  
259 order differential equations which depend on both, the parametrised intrinsic  
260 and extrinsic connection strengths. This enables the computation of the linear  
261 mapping from the endogenous neuronal fluctuations to the EEG sensor spectral  
262 densities, and consequently, enables the modelling of differences in the spectra  
263 due to changes in the underlying parameters; for example, the intrinsic and  
264 extrinsic connections. Here, for straight-forward interpretability, we modelled  
265 changes in extrinsic connections as a result of changes in the state of  
266 consciousness.

267

### 268 **2.3 Model specification**

269           Fitting a DCM model requires the specification of the anatomical  
270 locations of the nodes/sources a priori. Here, we modelled three canonical RSNs  
271 associated with consciousness (see for example Boly et al., 2008; Heine et al.,  
272 2012), namely the Default Mode Network (DMN), the Salience Network

273 (SAL), and the Central Executive Network (CEN). In addition, we modelled a  
274 fourth large-scale network (LAR) combining all the nodes and connections in  
275 the three RSNs above, with additional inter-RSN connections motivated by  
276 structural connectivity (details below). The node locations of the three RSNs  
277 modelled here were taken from Razi et al. (2017) and are shown in figure 1 with  
278 their respective schematic representations (the node locations in figure 1 and the  
279 effective connectivity modulations in figures 4A, 5A, 6A, and 7A were  
280 visualized with the BrainNet Viewer (Xia, Wang, & He, 2013,  
281 <http://www.nitrc.org/projects/bnv/>). The MNI coordinates are listed in table 1.  
282 Coincidentally, these same data have been previously source localised to the  
283 same locations as some of the key nodes in the RSNs modelled here (Murphy  
284 et al., 2011). We treated each node as a patch on the cortical surface for  
285 constructing the forward model ('IMG' option in SPM12; Daunizeau, Kiebel,  
286 & Friston, 2009).

287 Nodes in the 3 RSNs were connected via forward, backward, and lateral  
288 connections as described in David et al. (2006, 2005). Thus, each node (in each  
289 RSN-model) were modelled as a point source with the neuronal activity being  
290 controlled by operations following the Jansen-Rit model (Jansen & Rit, 1995).  
291 Note that all our models were fully connected. In addition to preserving the  
292 connections within the nodes of the original 3 RSNs, in the LAR, we  
293 additionally hypothesised potential connections between the 3 RSNs. Previous  
294 structural connectivity studies have identified a highly interconnected network  
295 of RSN hubs that seem to play a crucial role in integrating information in the  
296 brain, often termed the 'rich-club' (van den Heuvel & Sporns, 2011).  
297 Specifically, van den Heuvel and colleagues localised a number of these key-

298 hubs to regions comprising of the precuneus, superior lateral parietal cortices,  
299 and superior frontal cortex, thus, to some extent overlapping with some of the  
300 key-nodes in our RSN models. Therefore, as a structurally-informed way to  
301 investigate the potential anaesthesia-induced modulations of effective  
302 connectivity between the 3 RSNs, we specified – in addition to the already-  
303 specified connections in our RSNs – bi-directional connections between  
304 PCC/precuneus and left/right superior parietal nodes (connecting DMN and  
305 CEN), and between PCC/precuneus and anterior cingulate cortex (connecting  
306 DMN and SAL).

307 These three different types of connections in each model were specified  
308 in what is referred in the DCM literature as the ‘A-matrix’. In addition, to  
309 explicitly parameterise the effect of the session – i.e. the effect of the anaesthetic  
310 – on the connections, we allowed every connection to change (specified in the  
311 ‘B-matrix’).

312

313 **Table 1.** All the nodes and their corresponding MNI coordinates for the three resting  
314 state networks (adapted from Razi et al., 2017). The large model incorporated all these nodes  
315 as a single model.

| 316 | <u>Network</u>                         | <u>Coordinates (in mm)</u> |
|-----|----------------------------------------|----------------------------|
| 317 | <b>Default Mode Network</b>            | <b>x y z</b>               |
| 318 | <b>1</b> Left lateral parietal         | -46 -66 30                 |
| 319 | <b>2</b> Right lateral parietal        | 49 -63 33                  |
| 320 | <b>3</b> Posterior cingulate/Precuneus | 0 -52 7                    |
| 321 | <b>4</b> Medial prefrontal             | -1 54 27                   |

Computational modelling of anaesthetic-induced LOC

15

322

323

**Salience Network**

324

1 Left lateral parietal -62 -45 30

325

2 Right lateral parietal 62 -45 30

326

3 Dorsal anterior cingulate 0 21 36

327

4 Left anterior PFC -35 45 30

328

5 Right anterior PFC 32 45 30

329

330

**Central Executive Network**

331

1 Left superior parietal -50 -51 45

332

2 Right superior parietal 50 -51 45

333

3 Dorsal medial PFC 0 24 46

334

4 Left anterior PFC -44 45 0

335

5 Right anterior PFC 44 45 0

336

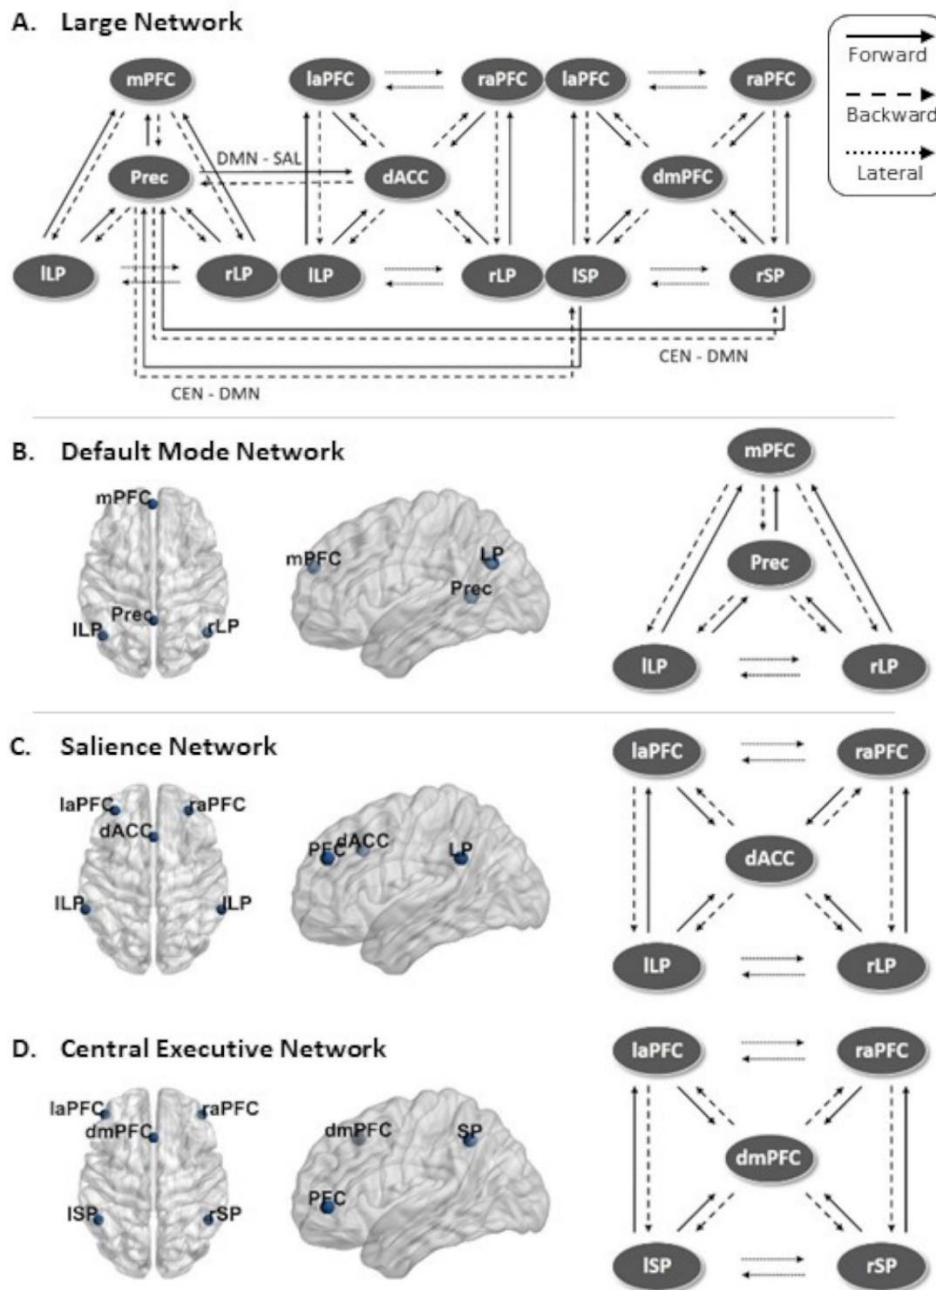

337

338 **Figure 1.** Full model schematics and node locations. **A.** Schematic view of the large  
 339 DCM model consisting of the 14 nodes and connections combining three RSNs. Inter-RSN  
 340 connections were specified between PCC/precuneus and bi-lateral superior parietal nodes, and  
 341 between PCC/precuneus and anterior cingulate cortex. **B-D.** Location of the nodes and the  
 342 schematic representation of the full model for DMN, SAL, and CEN, respectively.

343



344 **2.4 Model inversion**

345 In DCM, model inversion refers to fitting the models to best explain the  
346 empirical data of each participant's dataset, and thereby inferring a full  
347 probability density over the possible values of model parameters (with the  
348 expected values and covariance). Here, we first modelled the effects of propofol  
349 in terms of changes in connectivity that explained the differences in the  
350 empirical data observed in LOC as compared to behavioural responsiveness  
351 baseline (figure 3A). The EEG data used contained considerable peaks at the  
352 alpha range (8-12 Hz), and the default parameter settings in DCM for CSD  
353 failed to produce satisfactory fits to these peaks when inspected visually (see  
354 van Wijk et al., 2018, *p.* 824). To address this issue, we doubled the number of  
355 maximum iterations to 256 and estimated the models with two adjustments to  
356 the hyperparameters: first, we set the shape of the neural innovations (i.e. the  
357 baseline neuronal activity) to flat (-32) instead of the default mixture of white  
358 and pink (1/f) components (Moran et al., 2009). Second, we increased the noise  
359 precision value from 8 to 12 to bias the inversion process towards accuracy over  
360 complexity (see Friston et al., 2012 and Moran et al., 2009 for a detailed  
361 description of DCM for cross-spectral densities). In addition, for LAR the  
362 number of spatial modes was increased to 14 instead of the default of 8. The  
363 modes here refer to a reduction of the dimensionality of the data (done for  
364 computational efficiency) by projecting the data onto the principal components  
365 of the prior covariance, such that a maximum amount of information is retained  
366 (David et al., 2006; Fastenrath, Friston, & Kiebel, 2009; Kiebel, Garrido,  
367 Moran, & Friston, 2008).

368                   These adjustments led to our full models (i.e. DMN, SAL, CEN, and  
369 LAR) converging with satisfactory fits (inspected visually) to the spectrum for  
370 30/40 subject model instances (similar fits to what can be seen as the end result  
371 in figure 2). We then applied Bayesian Parameter Averaging (BPA) for each of  
372 the full models separately, averaging over the posteriors from the subject model  
373 instances that did converge and setting these averaged posteriors as new priors  
374 for the respective non-converged subject model instances. Estimating these  
375 subject model instances again with these BPA-derived priors produced  
376 satisfactory fits for all 10 remaining instances. Finally, we estimated all the full  
377 models again for all the participants with setting the posteriors from the earlier  
378 subject model estimations as updated priors, but this time with the neural  
379 innovations and noise precision set back to default settings. In doing so, all the  
380 models produced satisfactory fits with the default parameter settings for all of  
381 the participants (see figure 2).

382                   To validate that the priors we used in the final inversion were suitable,  
383 we compared the group-level model evidence obtained with and without the  
384 adjusted noise levels. With all full models, the default hyperparameter settings  
385 with the updated priors generated better model evidence (difference in free  
386 energies for LAR, DMN, SAL, and CEN were +47260, +9440, +15700, and  
387 +660, respectively). To qualitatively assess the model fits, the observed and  
388 model-predicted cross-spectra were visually compared in each participant and  
389 judged to be sufficiently similar. To be sure about our conclusions, we also  
390 performed the PEB modelling (see below) leaving out the fitted subject model  
391 instances that produced the worst fits (1-2 per model); this had no notable  
392 influence on the interpretation of the results. The same approach was followed

393 when inverting the full models separately for individual states of consciousness  
394 (figure 3B); in addition to the full models, here the BPA was also restricted to  
395 the same state of consciousness. The model-predicted and original spectral  
396 densities averaged over participants are shown in figure 2A, B, C, and D for  
397 LAR, DMN, SAL, and CEN, respectively.  
398

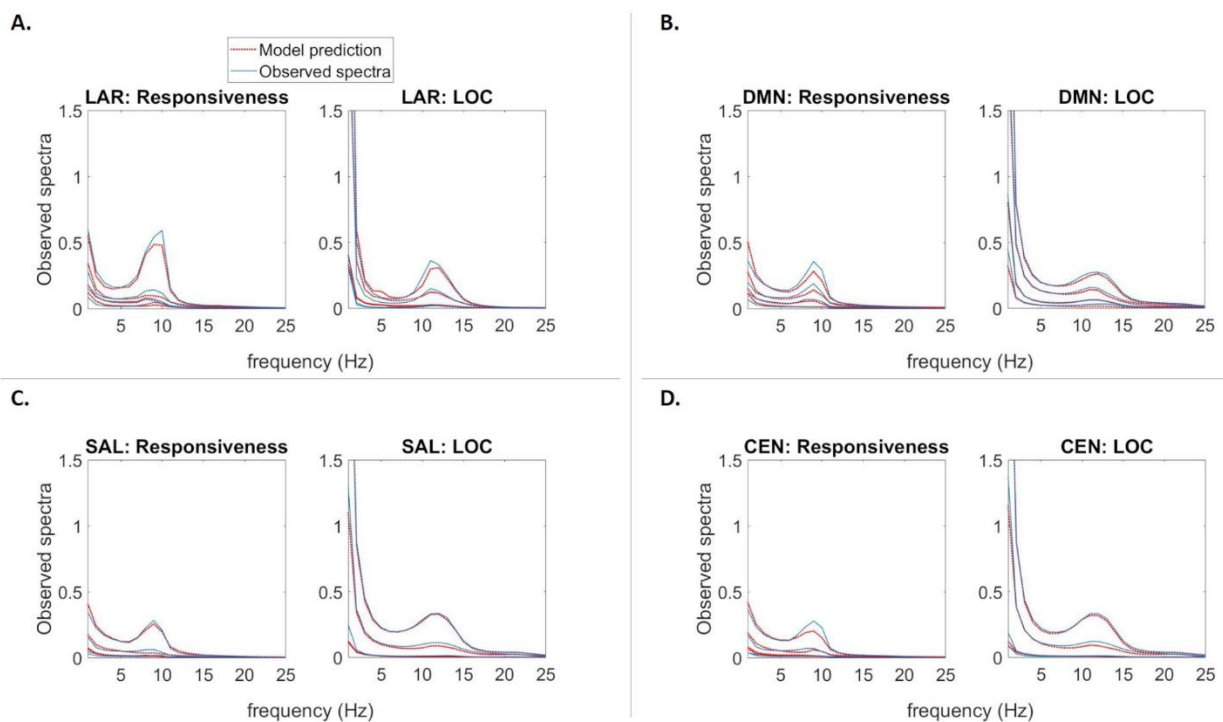

399  
400 **Figure 2.** Average model fits. **A-D.** Subject-averaged power spectra of the observed  
401 EEG channel-space data, juxtaposed with that predicted by the fitted DCM models of each  
402 RSN, in normal behavioural responsiveness and LOC. Individual lines reflect spatial modes.

403

## 404 2.5 Parametric Empirical Bayes

405 In DCM, a variational Bayesian scheme called Variational Laplace is  
406 used to approximate the conditional or posterior density over the parameters

407 given by the model inversion process, by maximizing a lower bound (the  
408 negative free energy) on the log-evidence (Friston et al., 2007). The Parametric  
409 Empirical Bayes (PEB) framework is a relatively recent supplement to the DCM  
410 procedure used, for example, to infer the commonalities and differences across  
411 subjects (Friston et al., 2016). Briefly, the subject-specific parameters of interest  
412 (here, effective connectivity between nodes in a DCM model) are taken to the  
413 group-level and modelled using a General Linear Model (GLM), partitioning  
414 the between-subject variability into designed effects and unexplained random  
415 effects captured by the covariance component. The focus is on using Bayesian  
416 model reduction (BMR) – a particularly efficient form of Bayesian model  
417 selection (BMS) – to enable inversion of multiple models of a single dataset and  
418 a single hierarchical Bayesian model of multiple datasets that conveys both the  
419 estimated connection strengths and their uncertainty (posterior covariance). As  
420 such, it is argued that hypotheses about commonalities and differences across  
421 subjects can be tested with more precise parameter estimates than with  
422 traditional frequentist comparisons (Friston et al., 2016).

423 A particular advantage of PEB is that as part of the BMR process – when  
424 no strong a priori hypotheses about the model structure exist, as in the present  
425 study – a greedy search can be used to compare the negative free energies for  
426 the reduced models, iteratively discarding parameters that do not contribute to  
427 the free energy (originally ‘post-hoc DCM analysis’, Friston & Penny, 2011;  
428 Rosa, Friston & Penny, 2012). The procedure stops when discarding any  
429 parameters starts to decrease the negative free energy, returning the model that  
430 most effectively trades-off goodness of fit and model complexity in explaining  
431 the data. Last, a Bayesian Model Average (BMA) is calculated over the best

432 256 models weighted by their model evidence (from the final iteration of the  
433 greedy search). For each connection, a posterior probability for the connection  
434 being present vs. absent is calculated by comparing evidence from all the  
435 models in which the parameter is switched on versus all the models in which it  
436 is switched off. Here, we applied a threshold of  $>.99$  posterior probability, in  
437 other words, connections with over  $.99$  posterior probability were retained.

438 For the DCMs that were fitted to the contrast between two states of  
439 consciousness using the procedure described in the previous section, we used  
440 PEB for second-level comparisons and Bayesian model reduction to find the  
441 most parsimonious model that explained the contrast by pruning away  
442 redundant connections. The focus was explicitly on the group-level comparison  
443 of the connectivity modulations (B-matrix). The whole sequence of steps is  
444 summarized in figure 3A.

445

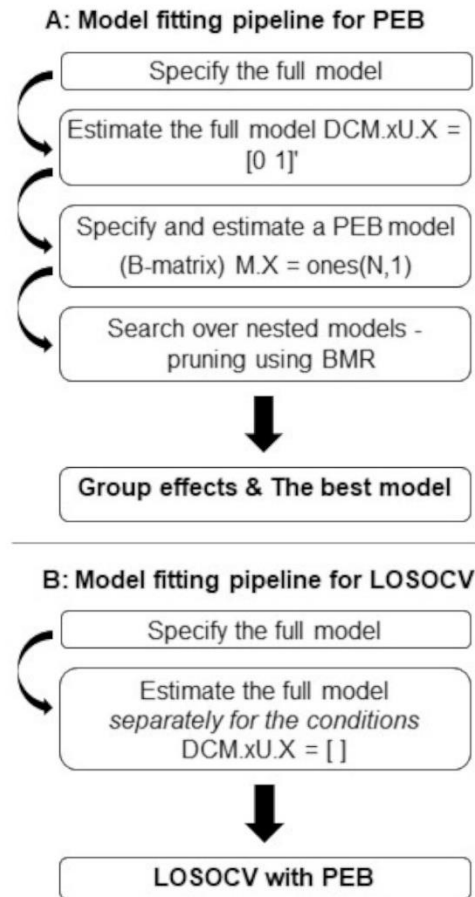

446

447

448

449

450

451

452

453

454

455

456

457

**Figure 3.** Modelling pipelines. **A.** The pipeline for inverting the DCM models in

terms of changes in connectivity that explain the differences in the empirical data observed in

LOC as compared to wakeful consciousness baseline. The DCM model inversion was

followed by PEB modelling with BMR to find the most parsimonious model and the

modulatory effects on the group-level effective connectivity. **B.** The pipeline for inverting the

DCM models separately for individual states of consciousness. This was done as a

prerequisite for the LOSOCV classification with PEB modelling.

## 2.6 Leave-one-out cross-validation paradigm

As a crucial form of validation of our modelling framework, we

investigated which network connections are predictive of the state of

458 consciousness in unseen data. We adapted a standard approach in computational  
459 statistics, leave-one-subject-out cross-validation (LOSOCV; `spm_dcm_loo.m`).  
460 Here, we iteratively fitted a multivariate linear model (as described in detail in  
461 Friston et al., 2016) to provide the posterior predictive density over connectivity  
462 changes, which was then used to evaluate the posterior belief of the explanatory  
463 variable for the left-out participant: in the present case, the probability of the  
464 consciousness state-class membership.

465 To conduct LOSOCV analysis, the DCM models were now fitted to each  
466 state of consciousness separately, as shown in the procedure visualised in figure  
467 3B. To cross-validate a fitted DCM model, both datasets from one participant  
468 were left-out each time *before* conducting PEB for the training data set, and the  
469 optimised empirical priors were then used to predict the state of consciousness  
470 (behavioural responsiveness/LOC) to which the datasets from the left-out  
471 participant belonged (see Friston et al., 2016 for details). This procedure,  
472 repeated for each participant, generated probabilities of state affiliation, which  
473 were used to calculate the Receiver Operating Characteristic (ROC) curves and  
474 Area Under the Curve (AUC) values with 95% point-wise confidence bounds  
475 across the cross-validation runs (see MATLAB `perfcurve`). In addition, the  
476 corresponding binary classification accuracy was calculated as the sum of true  
477 positives and true negatives divided by the sum of all assigned categories, i.e.  
478  $(TP+TN) / (TP+TN+FP+FN)$ , where TP = true positive, TN = true negative, FP  
479 = false positive, and FN = false negative.

480 We first estimated LOSOCV metrics for all connections in all models.  
481 Next, LOSOCV metrics of subsets of hypothesis-driven connections were  
482 tested; the connections preserved by BMR were divided into frontal, parietal,

483 frontoparietal, and between-RSN subsets, based on the anatomical location of  
484 the connected nodes. The rationale was to investigate where in the brain the  
485 most consistent inter-subject-level effects were located, in addition to the largest  
486 effect sizes identified by the PEB analysis.

487 Finally, we extended our validation of the DCM models by introducing  
488 a more difficult classification problem: we used the DCM parameters from  
489 responsiveness and LOC for training, and then tested them on unseen data  
490 collected during the post-drug recovery state of each subject (recovery state  
491 prediction). Again during training, both datasets (behavioural  
492 responsiveness/LOC) from one participant were left-out each time *before*  
493 conducting PEB, and the optimised empirical priors were then used to predict  
494 the state of consciousness to which the recovery-dataset from the left-out  
495 participant belonged. We hypothesised that if our modelled effects are valid, it  
496 should classify the recovery state as behavioural responsiveness rather than  
497 LOC - even though recovery is not identical to normal wakeful responsiveness,  
498 it is clearly closer to normal responsiveness than LOC. Here, we used recall -  
499 as calculated by  $(\text{true positive}) / (\text{true positive} + \text{false positive})$  - and mean  
500 posterior probability for responsiveness to quantify classification performance.  
501 The 95% CIs were calculated over the posterior probabilities using a simple  
502 approximation for the unbiased sample standard deviation (Gurland & Tripathi,  
503 1971).

504

505

### 3. Results

506



507 **3.1 Dynamic causal modeling and parametric empirical Bayes**

508 Our goal was to investigate the effective connectivity modulations  
509 caused by anaesthesia-induced loss of consciousness on three resting state  
510 networks together and separately. We modelled time-series recorded from two  
511 states of consciousness – wakeful behavioural responsiveness and loss of  
512 consciousness (LOC) – with DCM for CSD at a single-subject level, followed  
513 by PEB at the group-level. In doing so, we estimated the change in effective  
514 connectivity with RSNs during LOC, relative to behavioural responsiveness  
515 before anaesthesia. For the DMN, we estimated 12 inter-node connections, and  
516 for both SAL and CEN 16 connections. With LAR, in addition to including all  
517 the connections in each RSN, additional connections were specified to model  
518 the modulatory effects of anaesthesia on between-RSN connections, increasing  
519 the estimated inter-node connections to fifty.

520 Following the inversion of the second-level PEB model, a greedy search  
521 was implemented to prune away connections that did not contribute  
522 significantly to the free energy using BMR. This procedure was performed for  
523 LAR and for all the three resting state networks separately. The most  
524 parsimonious model (A) and estimated log scaling parameters (B) for LAR,  
525 DMN, SAL, and CEN are shown in figures 4-7, respectively. Here, we applied  
526 a threshold of  $>.99$  for the posterior probability; in other words, connections that  
527 were pruned by BMR and connections with lower than  $.99$  posterior probability  
528 with their respective log scaling parameter are faded out (figures 4B-7B).

529 Of the fifty connections in the large model (figure 4), five were pruned  
530 away by BMR. The results indicate that typically effective connectivity

531 decreased going from behavioural responsiveness to LOC between nodes in the  
532 DMN, with parietal connections showing consistent and large decreases.  
533 Similarly, between-RSN parietal connections linking DMN and CEN also  
534 decreased. Backward connections between the dACC and PCC/precuneus,  
535 linking the DMN and SAL, increased slightly. A clear majority of connections  
536 forming the SAL and CEN networks increased.

537 On inverting the DMN separately (figure 5), we found that no  
538 connections were pruned away by BMR. In other words, all of the effective  
539 connectivity in the DMN was modulated by the loss of consciousness. In  
540 particular, forward connectivity to and from PCC/precuneus largely decreased,  
541 whereas direct parietofrontal forward connectivity from lateral parietal cortices  
542 to the medial prefrontal cortex was increased. Backward connectivity between  
543 all the sources was increased.

544 In contrast, seven connections out of 16 were pruned away from the full  
545 SAL model when it was inverted separately (figure 6). These consisted of all  
546 but one lateral connections between both, the lateral prefrontal nodes and lateral  
547 parietal nodes, and all but one backward connection originating from the dACC.  
548 The strength of change in connectivity within the SAL was lower than in DMN,  
549 and all but one of the retained connections showed an increase in strength when  
550 losing consciousness.

551 When inverting the CEN separately, two connections were pruned away  
552 (figure 7). Most of the retained connections showed a small increase in strength,  
553 with the largest effects in frontoparietal connections from the dmPFC to the left

554 superior parietal cortex. Further, right hemisphere frontoparietal connections  
555 showed more modulatory changes than left hemisphere connections.

556

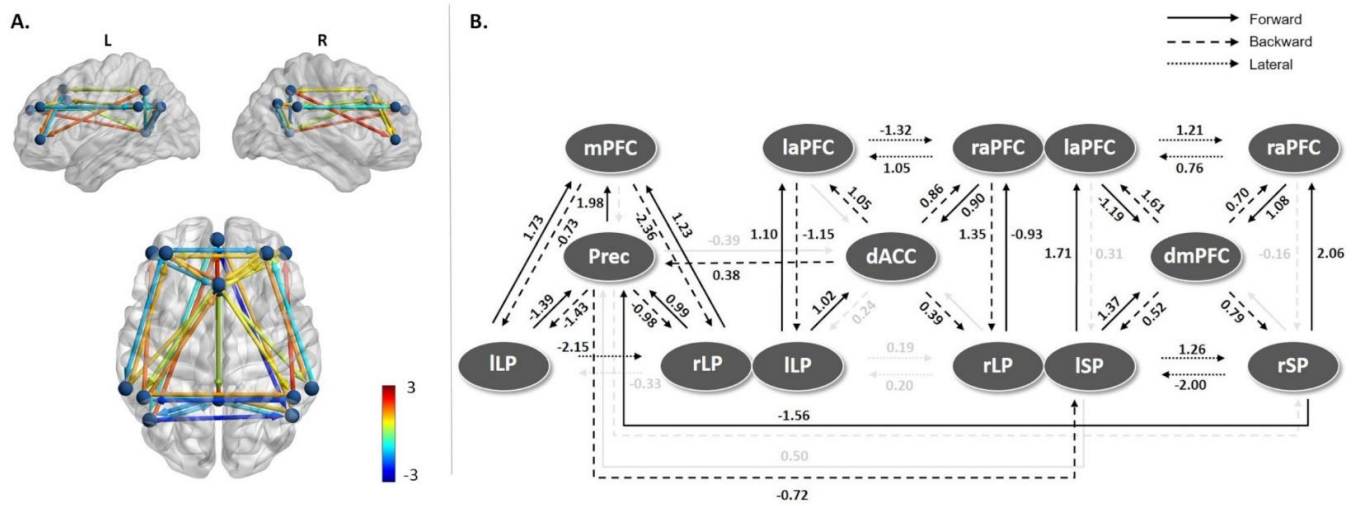

557

558 **Figure 4.** Estimated model parameters for LAR. **A.** Effective connectivity modulations  
559 on the most parsimonious LAR model. 5 connections were pruned away by BMR and a further  
560 8 had lower than .99 posterior probability of being present. Colour shows modulation strength  
561 and direction. **B.** The log scaling parameters for the connections in the large model after BMR  
562 and BMA. Connections that were pruned by BMR and connections with lower than .99  
563 posterior probability with their respective log scaling parameter are faded out.

564

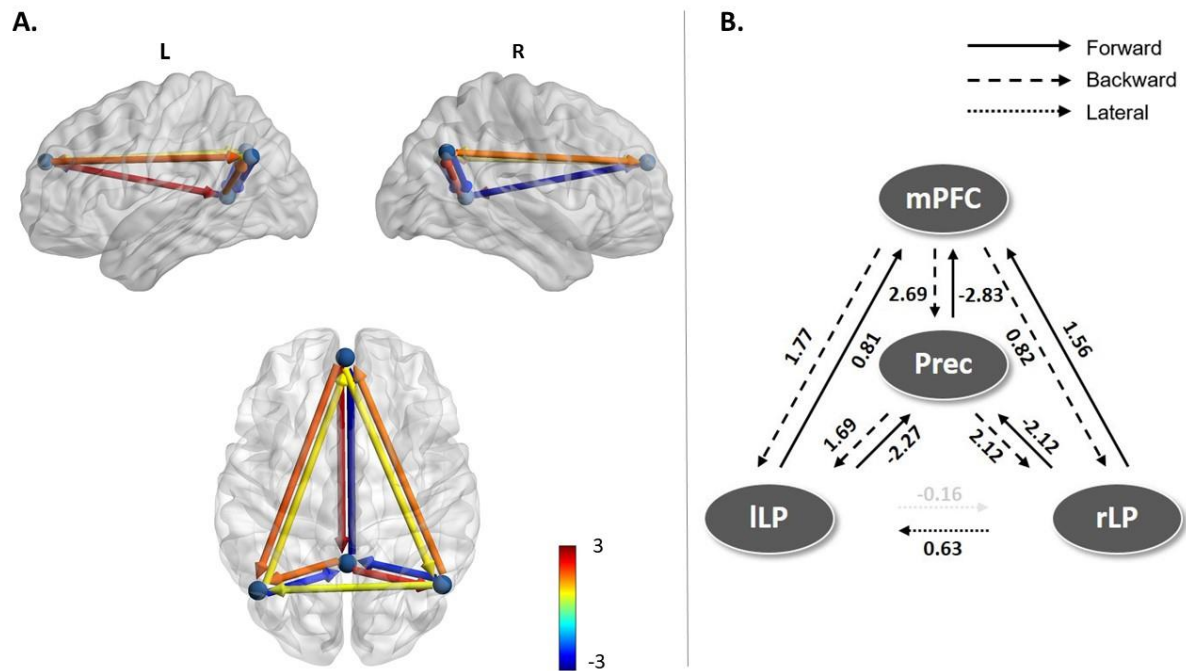

565

566 **Figure 5.** Estimated model parameters for DMN. **A.** Effective connectivity  
567 modulations on the most parsimonious DMN model. Colour of connections show strength and  
568 direction of modulation. None of the connections were pruned away, and only one connection  
569 had lower than .99 posterior probability. **B.** The log scaling parameters for the connections in  
570 DMN after BMR and BMA. The below-threshold posterior probability connection with its  
571 corresponding log scaling parameter is faded out.

572

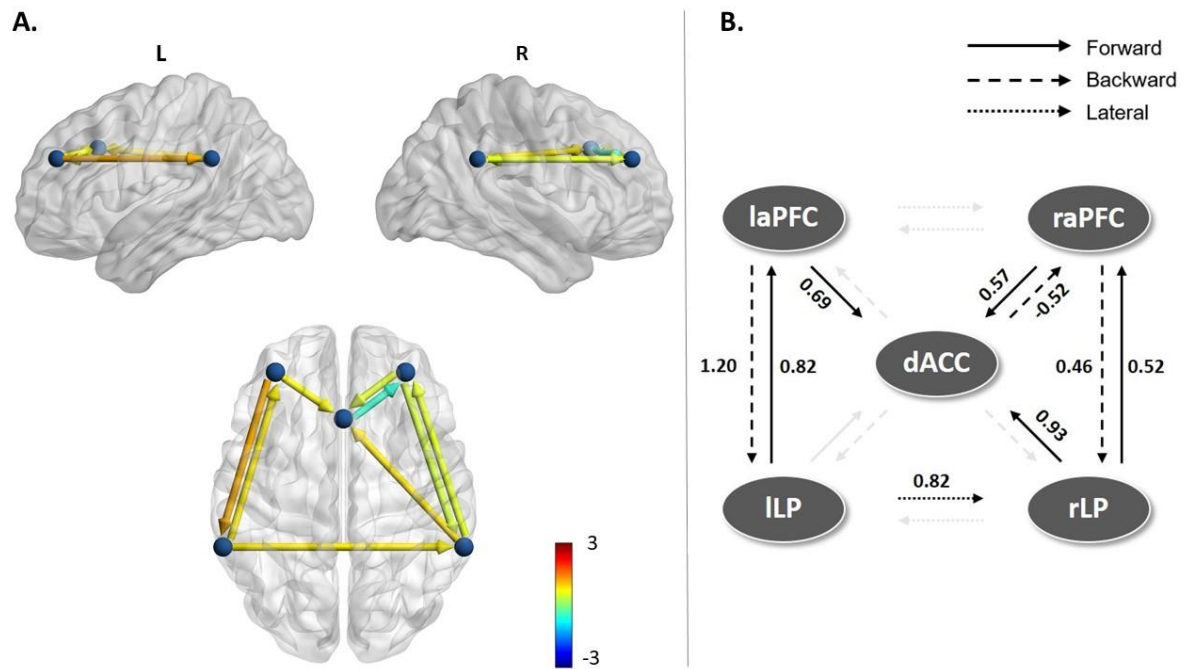

573

574 **Figure 6.** Estimated model parameters for SAL. **A.** Effective connectivity modulations  
575 on the most parsimonious model for SAL. 7 connections were pruned by BMR. **B.** The log  
576 scaling parameters for the connections in SAL. Several connections were pruned away (faded  
577 out). The retained connections were almost all positive modulations, but smaller in strength  
578 than in the DMN.

579

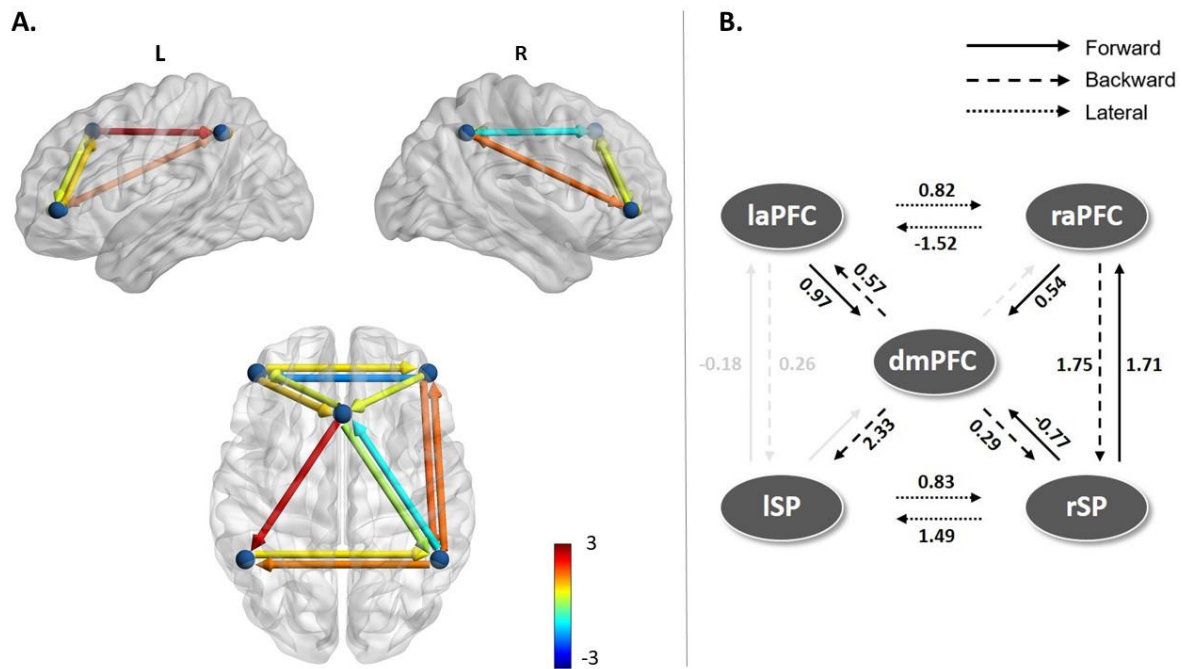

580

581 **Figure 7.** Estimated model parameters for CEN. **A.** Effective connectivity modulations  
582 on the most parsimonious model for CEN. 2 connections were redundant in addition to 2  
583 connections having lower than .99 posterior probability for being switched on. **B.** The log  
584 scaling parameters for the connections in CEN. Pruned connections and low posterior  
585 probability connections with the corresponding log scaling parameters are faded out. Effects  
586 on the remaining connections were almost all positive modulations, with strengths in-between  
587 those observed in the SAL and DMN.

588

### 589 3.2 Leave-one-subject-out cross-validation

590 To conduct LOSOCV, the DCM models were inverted again, this time  
591 for each state of consciousness in each subject separately. With the states  
592 modelled separately, PEB was conducted repeatedly (on the training set in each  
593 cross-validation run) alongside LOSOCV analysis to generate AUC values (see  
594 Methods). The AUC/ROC values for all full models are shown in figure 8A,

595 and table 2 shows all tested AUC values with accuracy for all tested sets of  
596 connections. The results indicate that leave-one-subject-out cross-validated  
597 predictions based on the LAR and SAL models had accuracy significantly  
598 different from chance, i.e. with the lower bound of the 95% CI of the AUC  
599 above chance. However, for predictions based on the DMN and CEN, the lower  
600 bound of the 95% CI of the predictions did not exceed chance.

601 To understand whether specific connections within cortical brain  
602 networks were driving changes in consciousness, we evaluated the predictive  
603 power of four different hypothesis-driven subsets of connections – frontal,  
604 parietal, frontoparietal, or between-RSN – to predict the two states of  
605 consciousness in left-out subjects. As shown in figure 8B, frontoparietal  
606 connectivity in LAR, DMN, and SAL produced the best predictions of the state  
607 of consciousness with LOSOCV. Further, the posterior subset in the SAL  
608 performed statistically better than chance. None of the subsets in the CEN  
609 reached statistical significance.

610 Finally, the predictive power of these RSN connectivity subsets were  
611 tested in a more difficult classification problem: each model subset was trained  
612 on behavioural responsiveness and LOC, and then tested on the previously  
613 unseen ‘recovery’ state, the data which was collected after the participant  
614 regained consciousness. In figure 9A and B each data point represents one  
615 participant. Figure 9A shows the mean posterior probabilities of the recovery  
616 state being correctly classified as behavioural responsiveness when using all  
617 connections in a model as predictors. Figure 9B shows the same results for the  
618 frontal, parietal, frontoparietal, and between-RSN connections as predictors.  
619 When predicting with all connections, only classifications based on all

620 connections in LAR performed significantly better than chance. With the  
621 hypothesis-driven subsets of connections, frontoparietal connectivity within the  
622 DMN generalised best to the recovery state. Only one other subset – parietal  
623 connections in SAL – performed significantly better than chance, and almost as  
624 well as frontoparietal DMN connectivity (.82 vs. .79 posterior probability). All  
625 subsets with LAR performed statistically better than chance, however, with poor  
626 mean posterior probability values in comparison to DMN frontoparietal and  
627 SAL parietal connections. Table 2 shows the mean posterior probabilities and  
628 the corresponding recall values for all the tested connection sets and for all  
629 models. We verified that the predictive accuracy (of the unseen recovery state)  
630 was not driven by subject effects or bias, as evident in the individual posterior  
631 probabilities plotted in figures 9C and 9D.

632

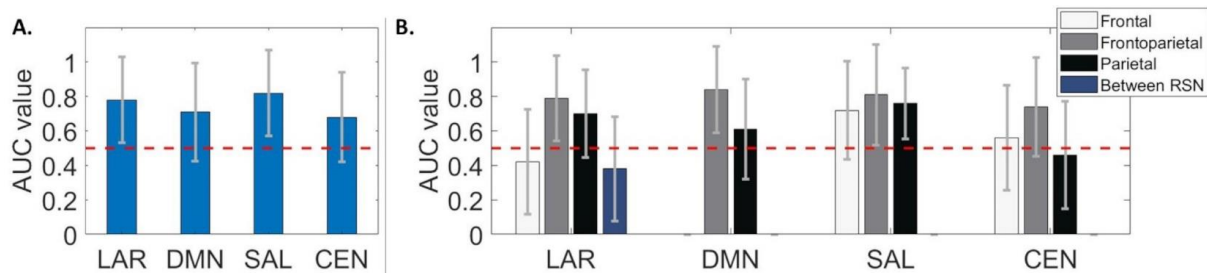

633

634 **Figure 8.** The AUC values for classifying the state of consciousness in LOSOCV  
635 paradigm. **A.** For the full models, only predictions based on LAR and SAL performed  
636 statistically better than chance (red dashed line), with classifications based on the connections  
637 in SAL reaching the overall best prediction. The error bars represent the 95% point-wise CI  
638 calculated using leave-one-out cross-validation for both A and B (MATLAB `perfcurve`).

639 **B.** AUC values for hypothesis-driven connections for all models in LOSOCV paradigm. The  
640 DMN is missing frontal connections as it had only one anterior node. Best prediction



641 performance was obtained with frontoparietal connections in LAR, DMN, and SAL. Further,  
642 predictions based on posterior SAL connections reached statistical significance.

643

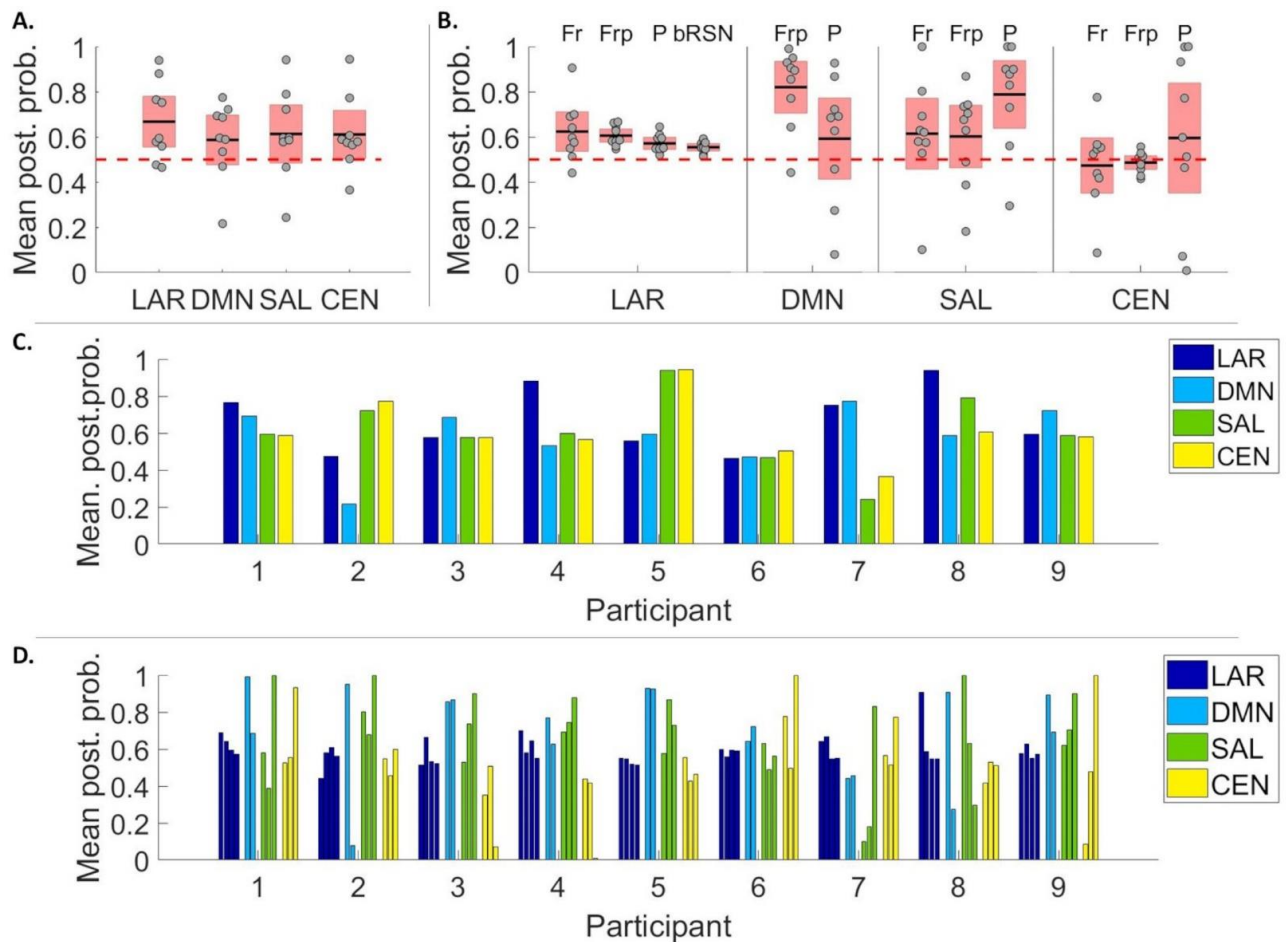

644

645 **Figure 9.** Mean posterior probabilities for prediction of recovery data. On panels A and  
646 B the individual data points represent individual participants. **A.** Predictions based on all  
647 connections in LAR performed better than chance (red dashed line). Data points representing  
648 participants are laid over a 1.96 SEM (95% confidence interval over posterior probabilities) in  
649 red with the black lines marking the mean. **B.** Mean posterior probabilities for hypothesis-  
650 driven connection subsets of all models in the recovery state: top labels refer to frontal (Fr),  
651 frontoparietal (Frp), parietal (P), and between-RSN (bRSN) connections. DMN frontoparietal  
652 connectivity had the best performance across all sets and all models. Parietal connections in

653 SAL performed statistically better than chance but with lower posterior probability value in  
654 comparison to DMN frontoparietal connections. All subsets with LAR performed statistically  
655 better than chance, however, with poor posterior probability values in comparison to DMN  
656 frontoparietal and SAL parietal connections. **C-D.** Posterior probabilities predicted for  
657 individual datasets, based on all connections (C) and on hypothesis-driven subsets (D). In  
658 Panel D, the individual bars depict different connection subsets: frontal, frontoparietal,  
659 parietal, and between-RSN in LAR, frontoparietal and parietal in DMN, and frontal,  
660 frontoparietal, and parietal in SAL and CEN.

661

662 **Table 2.** AUC (accuracy) values calculated with LOSOCV, and mean posterior  
663 probabilities (recall) in the recovery state, for all connections, all hypothesis-driven  
664 connection subsets (frontal, parietal, frontoparietal, and between-RSN connections), and all  
665 models. No values are given if no such connection-subsets exist for the model.  
666 Accuracy/recall values were not calculated for connection subsets with performance close to  
667 chance (between 0.4 - 0.6). \* indicates significance estimated at 95% confidence intervals in  
668 both AUC and posterior probability.

669

| 670 <b>Model</b>         | 670 <b>Responsiveness/LOC</b> | 670 <b>Recovery</b>          |
|--------------------------|-------------------------------|------------------------------|
| 671                      | 671 <b>AUC (Accuracy)</b>     | 671 <b>Mean PP. (Recall)</b> |
| 672                      | 672 <b>All connections</b>    | 672 <b>All connections</b>   |
| 673 Large network        | 673 0.78 (0.80)*              | 673 0.67 (0.78)*             |
| 674 Default mode network | 674 0.71 (0.70)               | 674 0.59 (--)                |
| 675 Saliency network     | 675 0.82 (0.80)*              | 675 0.61 (0.78)              |

Computational modelling of an anaesthetic-induced LOC

35

|     |                           |                       |                 |                       |                 |
|-----|---------------------------|-----------------------|-----------------|-----------------------|-----------------|
| 676 | Central executive network | 0.68 (0.70)           |                 | 0.61 (0.89)           |                 |
| 677 |                           |                       |                 |                       |                 |
| 678 |                           | <b>Frontal</b>        | <b>Parietal</b> | <b>Frontal</b>        | <b>Parietal</b> |
| 679 | Large network             | 0.42 (--)             | 0.70 (0.65)     | 0.62 (0.89)*          | 0.57 (--)*      |
| 680 | Default mode network      | --                    | 0.61 (.65)      | --                    | 0.59 (--)       |
| 681 | Saliency network          | 0.72 (0.65)           | 0.76 (0.65)*    | 0.61 (.89)            | 0.79 (0.89)*    |
| 682 | Central executive network | 0.56 (--)             | 0.46 (--)       | 0.47 (--)             | 0.60 (--)       |
| 683 |                           |                       |                 |                       |                 |
| 684 |                           | <b>Frontoparietal</b> | <b>BRSN</b>     | <b>Frontoparietal</b> | <b>BRSN</b>     |
| 685 | Large network             | 0.79 (0.80)*          | 0.38 (0.55)     | 0.61 (1.00)*          | 0.55 (--)*      |
| 686 | Default mode network      | 0.84 (0.85)*          | --              | 0.82 (0.89)*          | --              |
| 687 | Saliency network          | 0.81 (0.75)*          | --              | 0.60 (--)             | --              |
| 688 | Central executive network | 0.75 (0.70)           | --              | 0.49 (--)             | --              |
| 689 |                           |                       |                 |                       |                 |

690

691

692

## 4. Discussion

693

694

695

696

697

698

We computationally evaluated the evidence for the posterior hot zone theory of consciousness by modelling the relative contributions of three resting state networks (DMN, SAL, and CEN) for propofol-induced LOC. Using the recently introduced PEB framework, we characterised modulations in effective connectivity accompanying the loss of consciousness within and between these key RSNs. We found a selective breakdown of posterior parietal and medial

699 feedforward frontoparietal connectivity within the DMN, and of parietal inter-  
700 network connectivity linking DMN and CEN. These results contribute to the  
701 current understanding of anaesthetic-induced LOC, and more generally to the  
702 discussion of whether the neural correlates of consciousness have an anterior  
703 contribution (Del Cul, Dehaene, Reyes, Bravo, & Slachevsky, 2009), are  
704 predominantly frontoparietal (Bor & Seth, 2012; Chennu et al., 2014; Chennu,  
705 O'Connor, Adapa, Menon, & Bekinschtein, 2016; Laureys & Schiff, 2012), or  
706 posterior (Koch et al., 2016; Koch et al., 2016b; Siclari et al., 2017).

707 We used a novel DCM-based cross-validation to establish the predictive  
708 validity of our models, addressing an issue commonly present in DCM studies,  
709 including previous consciousness-related DCM studies - that the best model  
710 identified by BMS is only the best model among the models tested. Significant  
711 generalisation performance with cross-validation increases the level of  
712 confidence we can ascribe to our results. This analysis highlighted that  
713 frontoparietal effective connectivity consistently generated accurate predictions  
714 of individual states of consciousness. Furthermore, we demonstrated  
715 generalisation of this predictive power by showing that effective frontoparietal  
716 connectivity within the DMN and parietal connectivity within the SAL  
717 predicted the state of consciousness in unseen data from the post-anaesthetic  
718 recovery state.

719 With the large model combining all 3 RSNs, we observed consistent and  
720 wide-spread decreases in connectivity between posterior DMN nodes and  
721 between parietal connections linking DMN and CEN (figure 4). With the  
722 individual RSNs, we observed a selective breakdown of the DMN, specifically,  
723 decreases in feedforward connectivity to and from PCC/precuneus (figure 5). It

724 is worth highlighting that the largest decreases in effective connectivity - both  
725 when the RSNs were modelled individually and as one large network - were  
726 between nodes located within the posterior hot zone, and related specifically to  
727 PCC/precuneus – a key structure in the hot zone (Koch et al., 2016; Siclari et  
728 al., 2017). In other words, the network-level breakdown characterising the  
729 difference between behavioural responsiveness and LOC was mostly located  
730 within the parietal hot zone.

731 In the SAL and CEN networks, when fitted on their own, several  
732 connections were pruned away by BMR, with small increases in the majority of  
733 preserved connections;  $\frac{1}{4}$  of the connections in CEN and almost half of the  
734 connections in SAL (7 out of 16) were pruned, in contrast to the DMN in which  
735 no connections were pruned (figures 6 and 7). The same pattern was present,  
736 although to a smaller degree, when the three RSNs were estimated together  
737 (LAR): fewest of the connections pruned were in the DMN, when compared  
738 with the SAL and CEN networks. This highlights the relative importance of the  
739 DMN over the SAL and CEN in explaining differences between states of  
740 consciousness and is consistent with the previous evidence from disorders of  
741 consciousness (Crone et al., 2011; Fernández-Espejo et al., 2012; Laureys,  
742 2005; Laureys et al., 1999), anaesthesia (Boveroux et al., 2010), and sleep  
743 (Horovitz et al., 2009).

744 We found that PCC/precuneus-related feedforward connectivity in the  
745 DMN is impaired during LOC. This is in contrast to two previous DCM studies  
746 of propofol anaesthesia, which have suggested either selective impairments in  
747 frontoparietal feedback connectivity from dACC to PCC (Boly et al., 2012), or  
748 subcortico-cortical modulations from globus pallidus to PCC (Crone et al.,

749 2017). However, there are major methodological differences between the  
750 present study and the previous two that could explain these different results.  
751 Firstly, the examined model space was different. Secondly, both previous  
752 studies used models with only two cortical nodes summarising activity of  
753 frontal and parietal regions. They did not implement a wide search over a large  
754 model space using BMR and instead focused on evaluating a small number of  
755 hypothesis-specific models. We adopted a broader approach to model  
756 formulation and evaluation. In doing so, we expand upon these previous results  
757 by suggesting a selective breakdown of PCC/precuneus-related forward  
758 connectivity within the DMN. Our results differed from Boly et al. (2012) even  
759 when the direct connections between dACC and PCC/precuneus were modelled  
760 (in LAR) – we found an increase in feedback connectivity from dACC to  
761 PCC/precuneus and a small, low probability decrease in feed-forward  
762 connectivity. Our results are, however, in line with previous studies showing  
763 increased frontoparietal connectivity with partial directed coherence  
764 (Maksimow et al., 2014) and with Granger Causality (Barrett et al., 2012;  
765 Nicolaou, Hourris, Alexandrou, & Georgiou, 2012) during anaesthesia.

766 It is noteworthy that impaired feedforward connectivity has been  
767 suggested to be the main modulation caused by propofol-anaesthesia in a recent  
768 DCM study with TMS-evoked potentials by Sanders et al. (2018). Their models  
769 consisted of 6 cortical sources (bilateral inferior occipital gyrus (IOG), bilateral  
770 dorsolateral PFC, and bilateral superior parietal lobule (SPL). They found  
771 predominantly impaired feedforward connectivity from right IOG to right SPL  
772 (specifically with theta/alpha-gamma coupling). Although they suggested that  
773 resting state activity was driven by feedback connectivity, while induced

774 responses were driven by feedforward connectivity, it may be that restricting  
775 modulations to just two free parameters (connections) in the cortex simplifies  
776 the effects of propofol-induced LOC to the degree that they differ from  
777 estimations of more complex models.

778 Finally, the observed *increase* in effective connectivity between specific  
779 nodes (especially front-to-back) has been suggested previously to be due to the  
780 drug-specific effects of propofol rather than changes in states of consciousness  
781 (Långsjö et al., 2012; Maksimow et al., 2014). Hence, it may be that the  
782 relatively uniform increases in connectivity in the SAL and CEN, and the  
783 increased feedback connectivity in the DMN, were specific to propofol.

784 While the results of the LOSOCV cross-validation should be interpreted  
785 with caution given the limited number of participants in our study, the results  
786 indicated that, when using all connections, the above-chance prediction  
787 performance of conscious state was only obtained with LAR and SAL, with the  
788 latter performing the best (figure 8A). With smaller, hypothesis-driven subsets,  
789 we found that the frontoparietal connections provided consistently the most  
790 accurate predictions in all models except the CEN (figure 8B). When predicting  
791 the unseen state of recovery (figure 9B), frontoparietal DMN connections  
792 performed the best, followed by parietal connections in SAL. It is worth  
793 highlighting that the frontoparietal DMN and parietal SAL connections predict  
794 the state correctly, even when the state actually differs from the true training  
795 state; recovery differs from normal wakeful responsiveness not only  
796 behaviourally, but also in terms of the residual propofol in the blood. However,  
797 the participants are conscious and responsive, and thus, recovery is considered  
798 as a state clearly closer to normal wakeful responsiveness than LOC.

799                   Taken together, our prediction results highlighted an important role for  
800                   frontoparietal connections. This is perhaps not surprising, as wakeful awareness  
801                   is known to recruit the DMN (Raichle & Snyder, 2007); maintaining a state of  
802                   conscious responsiveness requires an interaction between the posterior hot zone  
803                   (the role of which is highlighted when modelling the *change* between states)  
804                   and frontal areas, mediated by the frontoparietal connections. Previous literature  
805                   has suggested dynamic changes in connectivity between brain networks during  
806                   cognitive control (Cocchi, Zalesky, Fornito, & Mattingley, 2013; Leech, Braga,  
807                   & Sharp, 2012) and anaesthetic-induced loss of consciousness (Luppi et al.  
808                   2019). The importance of frontoparietal connections in the present study when  
809                   predicting states of behavioural responsiveness – a state of higher integration  
810                   than LOC – is consistent with the notion that conscious, behavioural  
811                   responsiveness requires a brain-wide “global workspace” supported by the  
812                   frontoparietal network (Baars, 1997; Dehaene & Changeux, 2011; Dehaene,  
813                   Changeux & Christen, 2011; Mashour, Roelfsema, Changeux, & Dehaene,  
814                   2020). Hence, it is perhaps no surprise that the role of frontoparietal connections  
815                   became prominent when we predicted individual states of consciousness rather  
816                   than the contrast between them.

817                   Lastly, a number of previous studies have suggested a pivotal role of  
818                   subcortical structures in transitions to unconsciousness (e.g. Baker et al., 2014;  
819                   Liu et al., 2013; White & Alkire, 2003). Crone et al. (2017) reported a  
820                   breakdown of connectivity between the globus pallidus and posterior cingulate  
821                   cortex connectivity during LOC, followed by a reversal at recovery. It remains  
822                   a possibility that the effective connectivity modulations found in the present  
823                   study – especially in relation to the PCC/precuneus - are driven by subcortical



824 structures that we did not model here, given the limitations of scalp EEG signals  
825 (Goldenholz et al., 2009). It might be worthwhile to further investigate the  
826 effects of LOC with fMRI DCMs, including large-scale models combining  
827 cortical and subcortical nodes with PEB with BMR to conduct a wider  
828 exploration of the model space.

829 In addition to the modelling being limited only to cortico-cortical  
830 connections, some of our results are arguably propofol-specific; for example,  
831 very different alterations have been observed between propofol and ketamine  
832 (Driesen et al., 2013; Sarasso et al., 2015). It may be modelling the cortical  
833 effects of other anaesthetic agents would lead to very different sets of results.  
834 Despite using propofol as the tool to modulate the state of consciousness, we  
835 decided to model the effects using DCM and the standard neuronal model (ERP;  
836 based on the Jansen-Rit model), rather than models designed to better capture  
837 the subtle properties of the EEG spectrum during anaesthesia (see for example  
838 Bojak & Liley, 2005; Hutt & Longtin, 2010). Here, the methods were chosen  
839 based on the aim to model consciousness rather than the subtleties of  
840 anaesthesia. Lastly, as we tested only a pre-specified model space, the  
841 limitations imposed by this scope might have missed important mechanisms of  
842 conscious awareness not modelled here.

843 Notwithstanding these points, our results highlight a selective  
844 breakdown of inter- and intra-RSN effective connectivity in the parietal cortex,  
845 reinforcing the role of the posterior hot zone for human consciousness.  
846 However, modulations of frontoparietal connections were consistent enough to  
847 predict states in unseen data, demonstrating their causal role in maintaining  
848 behavioural responsiveness.

849

## References

- 850 Baars, B. J. (1997). In the theatre of consciousness. Global Workspace Theory, a rigorous  
851 scientific theory of consciousness. *Journal of Consciousness Studies*, 4(4), 292–309.  
852 <https://doi.org/10.1093/acprof:oso/9780195102659.001.1>
- 853 Baker, R., Gent, T. C., Yang, Q., Parker, S., Vyssotski, A. L., Wisden, W., ... Franks, N. P.  
854 (2014). Altered activity in the central medial thalamus precedes changes in the  
855 neocortex during transitions into both sleep and propofol anesthesia. *Journal of*  
856 *Neuroscience*, 34(40), 13326–13335. [https://doi.org/10.1523/JNEUROSCI.1519-](https://doi.org/10.1523/JNEUROSCI.1519-14.2014)  
857 14.2014
- 858 Barrett, A. B., Murphy, M., Bruno, M. A., Noirhomme, Q., Boly, M., Laureys, S., & Seth, A.  
859 K. (2012). Granger causality analysis of steady-state electroencephalographic signals  
860 during propofol-induced anaesthesia. *PLoS ONE*, 7(1).  
861 <https://doi.org/10.1371/journal.pone.0029072>
- 862 Bojak, I., & Liley, D. T. J. (2005). Modeling the effects of anesthesia on the  
863 electroencephalogram. *Physical Review E - Statistical, Nonlinear, and Soft Matter*  
864 *Physics*, 71(4), 1–22. <https://doi.org/10.1103/PhysRevE.71.041902>
- 865 Boly, M., Moran, R., Murphy, M., Boveroux, P., Bruno, M.-A., Noirhomme, Q., ... Friston,  
866 K. (2012). Connectivity Changes Underlying Spectral EEG Changes during Propofol-  
867 Induced Loss of Consciousness. *Journal of Neuroscience*, 32(20), 7082–7090.  
868 <https://doi.org/10.1523/JNEUROSCI.3769-11.2012>
- 869 Boly, M., Phillips, L., Tshibanda, A., Vanhaudenhuyse, M., Schabus, D., Dang-Vu, T. T.,  
870 Moonen, G., Hustinx, R., ... Laureys, S. (2008). Intrinsic Brain Activity in Altered  
871 States of Consciousness: How Conscious Is the Default Mode of Brain Function? *Annals*

- 872 *of the New York Academy of Sciences, 1129*, 119–129.
- 873 <https://doi.org/10.1196/annals.1417.015>.Intrinsic
- 874 Boly, Mélanie, Moran, R., Murphy, M., Boveroux, P., Noirhomme, Q., Ledoux, D., &  
875 Bonhomme, V. (2012). Connectivity changes underlying spectral EEG changes during  
876 propofol-induced loss of consciousness. *Journal of Neuroscience, 32*(20), 7082–7090.  
877 <https://doi.org/10.1523/JNEUROSCI.3769-11.2012>.Connectivity
- 878 Bonhomme, V., Staquet, C., Montupil, J., Defresne, A., Kirsch, M., Martial, C., ... Gosseries,  
879 O. (2019). General Anesthesia: A Probe to Explore Consciousness. *Frontiers in Systems*  
880 *Neuroscience, 13*(August). <https://doi.org/10.3389/fnsys.2019.00036>
- 881 Bor, D., & Seth, A. K. (2012). Consciousness and the prefrontal parietal network: Insights  
882 from attention, working memory, and chunking. *Frontiers in Psychology, 3*(MAR), 1–  
883 14. <https://doi.org/10.3389/fpsyg.2012.00063>
- 884 Boveroux, P., Vanhaudenhuyse, A., Bruno, M.-A., Noirhomme, Q., Lauwick, S., Luxen, A.,  
885 ... Boly, M. (2010). Breakdown of within- and between-network Resting State during  
886 Propofol-induced Loss of Consciousness. *Anesthesiology, 113*(5), 1038–1053.
- 887 Chennu, S., Finoia, P., Kamau, E., Allanson, J., Williams, G. B., Monti, M. M., ...  
888 Bekinschtein, T. A. (2014). Spectral Signatures of Reorganised Brain Networks in  
889 Disorders of Consciousness. *PLoS Computational Biology, 10*(10).  
890 <https://doi.org/10.1371/journal.pcbi.1003887>
- 891 Chennu, S., O'Connor, S., Adapa, R., Menon, D. K., & Bekinschtein, T. A. (2016). Brain  
892 Connectivity Dissociates Responsiveness from Drug Exposure during Propofol-Induced  
893 Transitions of Consciousness. *PLoS Computational Biology, 12*(1), 1–17.  
894 <https://doi.org/10.1371/journal.pcbi.1004669>

- 895 Cocchi, L., Zalesky, A., Fornito, A., & Mattingley, J. B. (2013). Dynamic cooperation and  
896 competition between brain systems during cognitive control. *Trends in Cognitive*  
897 *Sciences*, 17(10), 493–501. <https://doi.org/10.1016/j.tics.2013.08.006>
- 898 Crone, J. S., Ladurner, G., Höller, Y., Golaszewski, S., Trinka, E., & Kronbichler, M. (2011).  
899 Deactivation of the default mode network as a marker of impaired consciousness: An  
900 fmri study. *PLoS ONE*, 6(10). <https://doi.org/10.1371/journal.pone.0026373>
- 901 Crone, J. S., Lutkenhoff, E. S., Bio, B. J., Laureys, S., & Monti, M. M. (2017). Testing  
902 proposed neuronal models of effective connectivity within the cortico-basal  
903 gangliathalamo-cortical loop during loss of consciousness. *Cerebral Cortex*, 27(4),  
904 2727–2738. <https://doi.org/10.1093/cercor/bhw112>
- 905 Daunizeau, J., Kiebel, S. J., & Friston, K. J. (2009). Dynamic causal modelling of distributed  
906 electromagnetic responses. *NeuroImage*, 47(2), 590–601.  
907 <https://doi.org/10.1016/j.neuroimage.2009.04.062>
- 908 David, O., Harrison, L., & Friston, K. J. (2005). Modelling event-related responses in the  
909 brain. *NeuroImage*, 25(3), 756–770. <https://doi.org/10.1016/j.neuroimage.2004.12.030>
- 910 David, O., Kiebel, S. J., Harrison, L. M., Mattout, J., Kilner, J. M., & Friston, K. J. (2006).  
911 Dynamic causal modeling of evoked responses in EEG and MEG. *NeuroImage*, 30(4),  
912 1255–1272. <https://doi.org/10.1016/j.neuroimage.2005.10.045>
- 913 Dehaene, S., Changeux, J.-P., & Christen, Y. (2011). The Global Neuronal Workspace Model  
914 of Conscious Access: From Neuronal Architectures to Clinical Applications. *Research*  
915 *and Perspectives in Neurosciences*, 18, 55–84. [https://doi.org/10.1007/978-3-642-](https://doi.org/10.1007/978-3-642-18015-6)  
916 18015-6
- 917 Dehaene, S., & Changeux, J. P. (2011). Experimental and Theoretical Approaches to

- 918 Conscious Processing. *Neuron*, 70(2), 200–227.
- 919 <https://doi.org/10.1016/j.neuron.2011.03.018>
- 920 Del Cul, A., Dehaene, S., Reyes, P., Bravo, E., & Slachevsky, A. (2009). Causal role of  
921 prefrontal cortex in the threshold for access to consciousness. *Brain*, 132(9), 2531–2540.  
922 <https://doi.org/10.1093/brain/awp111>
- 923 Driesen, N. R., McCarthy, G., Bhagwagar, Z., Bloch, M., Calhoun, V., D’Souza, D. C., ...  
924 Krystal, J. H. (2013). Relationship of resting brain hyperconnectivity and schizophrenia-  
925 like symptoms produced by the NMDA receptor antagonist ketamine in humans.  
926 *Molecular Psychiatry*, 18(11), 1199–1204. <https://doi.org/10.1038/mp.2012.194>
- 927 Fastenrath, M., Friston, K. J., & Kiebel, S. J. (2009). Dynamical causal modelling for  
928 M/EEG: Spatial and temporal symmetry constraints. *NeuroImage*, 44(1), 154–163.  
929 <https://doi.org/10.1016/j.neuroimage.2008.07.041>
- 930 Fernández-Espejo, D., Soddu, A., Cruse, D., Palacios, E. M., Junque, C., Vanhauzenhuyse,  
931 A., ... Owen, A. M. (2012). A role for the default mode network in the bases of  
932 disorders of consciousness. *Annals of Neurology*, 72(3), 335–343.  
933 <https://doi.org/10.1002/ana.23635>
- 934 Friston, K. J., Bastos, A., Litvak, V., Stephan, K. E., Fries, P., & Moran, R. J. (2012). DCM  
935 for complex-valued data: Cross-spectra, coherence and phase-delays. *NeuroImage*,  
936 59(1), 439–455. <https://doi.org/10.1016/j.neuroimage.2011.07.048>
- 937 Friston, K. J., Harrison, L., & Penny, W. (2003). Dynamic causal modelling. *NeuroImage*,  
938 19(4), 1273–1302. [https://doi.org/10.1016/S1053-8119\(03\)00202-7](https://doi.org/10.1016/S1053-8119(03)00202-7)
- 939 Friston, K., Mattout, J., Trujillo-Barreto, N., Ashburner, J., & Penny, W. (2007). Variational  
940 free energy and the Laplace approximation. *NeuroImage*, 34(1), 220–234.

- 941 <https://doi.org/10.1016/j.neuroimage.2006.08.035>
- 942 Friston, K., & Penny, W. (2011). Post hoc Bayesian model selection. *NeuroImage*, 56(4),  
943 2089–2099. <https://doi.org/10.1016/j.neuroimage.2011.03.062>
- 944 Friston, Karl J. (2011). Functional and Effective Connectivity: A Review. *Brain Connectivity*,  
945 1(1), 13–36. <https://doi.org/10.1089/brain.2011.0008>
- 946 Friston, Karl J., Litvak, V., Oswal, A., Razi, A., Stephan, K. E., Van Wijk, B. C. M., ...  
947 Zeidman, P. (2016). Bayesian model reduction and empirical Bayes for group (DCM)  
948 studies. *NeuroImage*, 128, 413–431. <https://doi.org/10.1016/j.neuroimage.2015.11.015>
- 949 Goldenholz, D. M., Ahlfors, S. P., Hämäläinen, M. S., Sharon, D., Ishitobi, M., Vaina, L. M.,  
950 & Stufflebeam, S. M. (2009). Mapping the signal-to-noise-ratios of cortical sources in  
951 magnetoencephalography and electroencephalography. *Human Brain Mapping*, 30(4),  
952 1077–1086. <https://doi.org/10.1002/hbm.20571>
- 953 Guldenmund, P., Gantner, I. S., Baquero, K., Das, T., Demertzi, A., Boveroux, P., ... Soddu,  
954 A. (2016). Propofol-Induced Frontal Cortex Disconnection: A Study of Resting-State  
955 Networks, Total Brain Connectivity, and Mean BOLD Signal Oscillation Frequencies.  
956 *Brain Connectivity*, 6(3), 225–237. <https://doi.org/10.1089/brain.2015.0369>
- 957 Gurland, J., & Tripathi, R. C. (1971). A simple approximation for unbiased estimation of the  
958 standard deviation. *American Statistician*, 25(4), 30–32.  
959 <https://doi.org/10.1080/00031305.1971.10477279>
- 960 Heine, L., Soddu, A., Gómez, F., Vanhauzenhuyse, A., Tshibanda, L., Thonnard, M., ...  
961 Demertzi, A. (2012). Resting state networks and consciousness Alterations of multiple  
962 resting state network connectivity in physiological, pharmacological, and pathological  
963 consciousness states. *Frontiers in Psychology*, 3(AUG), 1–12.

- 964 <https://doi.org/10.3389/fpsyg.2012.00295>
- 965 Horovitz, S. G., Braun, A. R., Carr, W. S., Picchioni, D., Balkin, T. J., Fukunaga, M., &  
966 Duyn, J. H. (2009). Decoupling of the brain's default mode network during deep sleep.  
967 *Proceedings of the National Academy of Sciences*, *106*(27), 11376–11381.  
968 <https://doi.org/10.1073/pnas.0901435106>
- 969 Hutt, A., & Longtin, A. (2010). Effects of the anesthetic agent propofol on neural  
970 populations. *Cognitive Neurodynamics*, *4*(1), 37–59. [https://doi.org/10.1007/s11571-](https://doi.org/10.1007/s11571-009-9092-2)  
971 [009-9092-2](https://doi.org/10.1007/s11571-009-9092-2)
- 972 Kiebel, S. J., Garrido, M. I., Moran, R. J., & Friston, K. J. (2008). Dynamic causal modelling  
973 for EEG and MEG. *Cognitive Neurodynamics*, *2*(2), 121–136.  
974 <https://doi.org/10.1007/s11571-008-9038-0>
- 975 Koch, C., Massimini, M., Boly, M., & Tononi, G. (2016a). Neural correlates of  
976 consciousness: Progress and problems. *Nature Reviews Neuroscience*, *17*(5), 307–321.  
977 <https://doi.org/10.1038/nrn.2016.22>
- 978 Koch, C., Massimini, M., Boly, M., & Tononi, G. (2016b). Posterior and anterior cortex —  
979 where is the difference that makes the difference? *Nature Reviews Neuroscience*, *17*(10),  
980 666–666. <https://doi.org/10.1038/nrn.2016.105>
- 981 Långsjö, J. W., Alkire, M. T., Kaskinoro, K., Hayama, H., Maksimow, A., Kaisti, K. K., ...  
982 Scheinin, H. (2012). Returning from oblivion: Imaging the neural core of consciousness.  
983 *Journal of Neuroscience*, *32*(14), 4935–4943.  
984 <https://doi.org/10.1523/JNEUROSCI.4962-11.2012>
- 985 Laureys, S., Goldman, S., Phillips, C., Van Bogaert, P., Aerts, J., Luxen, A., ... Maquet, P.  
986 (1999). Impaired effective cortical connectivity in vegetative state: Preliminary

- 987 investigation using PET. *NeuroImage*, 9(4), 377–382.
- 988 <https://doi.org/10.1006/nimg.1998.0414>
- 989 Laureys, Steven. (2005). The neural correlate of (un)awareness: Lessons from the vegetative  
990 state. *Trends in Cognitive Sciences*, 9(12), 556–559.
- 991 <https://doi.org/10.1016/j.tics.2005.10.010>
- 992 Laureys, Steven, & Schiff, N. D. (2012). Coma and consciousness: Paradigms (re)framed by  
993 neuroimaging. *NeuroImage*, 61(2), 478–491.
- 994 <https://doi.org/10.1016/j.neuroimage.2011.12.041>
- 995 Lee, M., Baird, B., Gosseries, O., Nieminen, J. O., Boly, M., Postle, B. R., ... Lee, S. W.  
996 (2019). Connectivity differences between consciousness and unconsciousness in non-  
997 rapid eye movement sleep: a TMS–EEG study. *Scientific Reports*, 9(1), 1–9.
- 998 <https://doi.org/10.1038/s41598-019-41274-2>
- 999 Lee, UnCheol, Kim, S., Noh, G. J., Choi, B. M., Hwang, E., & Mashour, G. A. (2009). The  
1000 directionality and functional organization of frontoparietal connectivity during  
1001 consciousness and anesthesia in humans. *Consciousness and Cognition*, 18(4), 1069–  
1002 1078. <https://doi.org/10.1016/j.concog.2009.04.004>
- 1003 Lee, Uncheol, Ku, S., Noh, G., Baek, S., Choi, B., & Mashour, G. A. (2015). Disruption of  
1004 Frontal-Parietal Communication by Ketamine, Propofol, and Sevoflurane.  
1005 *Anesthesiology*, 118(6), 1264–1275.
- 1006 <https://doi.org/10.1097/ALN.0b013e31829103f5>.Disruption
- 1007 Leech, R., Braga, R., & Sharp, D. J. (2012). Echoes of the brain within the posterior cingulate  
1008 cortex. *Journal of Neuroscience*, 32(1), 215–222.
- 1009 <https://doi.org/10.1523/JNEUROSCI.3689-11.2012>



- 1010 Liu, X., Lauer, K., Ward, D., Li, S.-J., & Hudetz, A. (2013). Differential Effects of Deep  
1011 Sedation with Propofol on the Specific and Nonspecific Thalamocortical Systems.  
1012 *Anesthesiology*, *118*(1), 59–69. <https://doi.org/10.1038/jid.2014.371>
- 1013 Luppi, A. I., Craig, M. M., Finioia, P., Williams, G. B., Naci, L., Menon, D. K., & Emmanuel,  
1014 A. (2019). Consciousness-specific dynamic interactions of brain integration and  
1015 functional diversity. *Nature Communications*, (Box 65). [https://doi.org/10.1038/s41467-](https://doi.org/10.1038/s41467-019-12658-9)  
1016 [019-12658-9](https://doi.org/10.1038/s41467-019-12658-9)
- 1017 Maksimow, A., Silfverhuth, M., Långsjö, J., Kaskinoro, K., Georgiadis, S., Jääskeläinen, S.,  
1018 & Scheinin, H. (2014). Directional connectivity between frontal and posterior brain  
1019 regions is altered with increasing concentrations of propofol. *PLoS ONE*, *9*(11), 1–16.  
1020 <https://doi.org/10.1371/journal.pone.0113616>
- 1021 Mashour, G. A., Roelfsema, P., Changeux, J. P., & Dehaene, S. (2020). Conscious Processing  
1022 and the Global Neuronal Workspace Hypothesis. *Neuron*, *105*(5), 776–798.  
1023 <https://doi.org/10.1016/j.neuron.2020.01.026>
- 1024 Moran, R. J., Stephan, K. E., Seidenbecher, T., Pape, H. C., Dolan, R. J., & Friston, K. J.  
1025 (2009). Dynamic causal models of steady-state responses. *NeuroImage*, *44*(3), 796–811.  
1026 <https://doi.org/10.1016/j.neuroimage.2008.09.048>
- 1027 Moran, R., Pinotsis, D. A., & Friston, K. (2013). Neural masses and fields in dynamic causal  
1028 modelling. *Frontiers in Computational Neuroscience*, *7*(APR 2013), 1–12.  
1029 <https://doi.org/10.3389/fncom.2013.00057>
- 1030 Murphy, M., Bruno, M. A., Riedner, B. A., Boveroux, P., Noirhomme, Q., Landsness, E. C.,  
1031 ... Boly, M. (2011a). Propofol anesthesia and sleep: A high-density EEG study. *Sleep*,  
1032 *34*(3). <https://doi.org/10.1093/sleep/34.3.283>

- 1033 Murphy, M., Bruno, M. A., Riedner, B. A., Boveroux, P., Noirhomme, Q., Landsness, E. C.,  
1034 ... Boly, M. (2011b). Propofol anesthesia and sleep: A high-density EEG study. *Sleep*,  
1035 34(3). <https://doi.org/10.1093/sleep/34.3.283>
- 1036 Nicolaou, N., Hourris, S., Alexandrou, P., & Georgiou, J. (2012). EEG-based automatic  
1037 classification of “awake” versus “anesthetized” state in general anesthesia using granger  
1038 causality. *PLoS ONE*, 7(3). <https://doi.org/10.1371/journal.pone.0033869>
- 1039 Raichle, M. E., & Snyder, A. Z. (2007). A default mode of brain function: A brief history of  
1040 an evolving idea. *NeuroImage*, 37(4), 1083–1090.  
1041 <https://doi.org/10.1016/j.neuroimage.2007.02.041>
- 1042 Ramsay, M. A. E., Savege, T. M., Simpson, B. R. J., & Goodwin, R. (1974). Hospital Topics  
1043 Controlled Sedation with Alphaxalone-Alphadolone. *British Medical Journal*, 22, 656–  
1044 659.
- 1045 Razi, A., & Friston, K. J. (2016). The Connected Brain: Causality, models, and intrinsic  
1046 dynamics. *IEEE Signal Processing Magazine*, 33(3), 14–55.  
1047 <https://doi.org/10.1109/MSP.2015.2482121>
- 1048 Razi, A., Seghier, M. L., Zhou, Y., McColgan, P., Zeidman, P., Park, H.-J., ... Friston, K. J.  
1049 (2017). Large-scale DCMs for resting-state fMRI. *Network Neuroscience*.  
1050 [https://doi.org/10.1162/NETN\\_a\\_00015](https://doi.org/10.1162/NETN_a_00015)
- 1051 Rosa, M. J., Friston, K., & Penny, W. (2012). Post-hoc selection of dynamic causal models.  
1052 *Journal of Neuroscience Methods*, 208(1), 66–78.  
1053 <https://doi.org/10.1016/j.jneumeth.2012.04.013>
- 1054 Salin, P. A., & Bullier, J. (1995). Corticocortical connections in the visual system: Structure  
1055 and function. *Physiological Reviews*, 75(1), 107–154.

- 1056 <https://doi.org/10.1152/physrev.1995.75.1.107>
- 1057 Sanders, R. D., Banks, M. I., Darracq, M., Moran, R., Sleight, J., Gosseries, O., ... Boly, M.  
1058 (2018). Propofol-induced unresponsiveness is associated with impaired feedforward  
1059 connectivity in cortical hierarchy. *British Journal of Anaesthesia*, *121*(5), 1084–1096.  
1060 <https://doi.org/10.1016/j.bja.2018.07.006>
- 1061 Sarasso, S., Boly, M., Napolitani, M., Gosseries, O., Charland-Verville, V., Casarotto, S., ...  
1062 Massimini, M. (2015). Consciousness and complexity during unresponsiveness induced  
1063 by propofol, xenon, and ketamine. *Current Biology*, *25*(23), 3099–3105.  
1064 <https://doi.org/10.1016/j.cub.2015.10.014>
- 1065 Schrouff, J., Perlberg, V., Boly, M., Marrelec, G., Boveroux, P., Vanhauzenhuysse, A., ...  
1066 Benali, H. (2011). Brain functional integration decreases during propofol-induced loss  
1067 of consciousness. *NeuroImage*, *57*(1), 198–205.  
1068 <https://doi.org/10.1016/j.neuroimage.2011.04.020>
- 1069 Sherman, S. M., & Guillery, R. W. (1998). On the actions that one nerve cell can have on  
1070 another: Distinguishing “drivers” from “modulators.” *Proceedings of the National*  
1071 *Academy of Sciences of the United States of America*, *95*(12), 7121–7126.  
1072 <https://doi.org/10.1073/pnas.95.12.7121>
- 1073 Siclari, F., Baird, B., Perogamvros, L., Bernardi, G., LaRocque, J. J., Riedner, B., ... Tononi,  
1074 G. (2017). The neural correlates of dreaming. *Nature Neuroscience*, *20*(6), 872–878.  
1075 <https://doi.org/10.1038/nn.4545>
- 1076 van den Heuvel, M. P., & Sporns, O. (2011). Rich-Club Organization of the Human  
1077 Connectome. *Journal of Neuroscience*. <https://doi.org/10.1523/jneurosci.3539-11.2011>
- 1078 van Wijk, B. C. M., Cagnan, H., Litvak, V., Kühn, A. A., & Friston, K. J. (2018). Generic

- 1079 dynamic causal modelling: An illustrative application to Parkinson’s disease.  
1080 *NeuroImage*, 181(January), 818–830. <https://doi.org/10.1016/j.neuroimage.2018.08.039>
- 1081 Vanhaudenhuyse, A., Noirhomme, Q., Tshibanda, L. J. F., Bruno, M. A., Boveroux, P.,  
1082 Schnakers, C., ... Boly, M. (2010). Default network connectivity reflects the level of  
1083 consciousness in non-communicative brain-damaged patients. *Brain*, 133(1), 161–171.  
1084 <https://doi.org/10.1093/brain/awp313>
- 1085 White, N. S., & Alkire, M. T. (2003). Impaired thalamocortical connectivity in humans  
1086 during general-anesthetic- induced unconsciousness. *NeuroImage*, 19(2), 402–411.  
1087 [https://doi.org/10.1016/S1053-8119\(03\)00103-4](https://doi.org/10.1016/S1053-8119(03)00103-4)
- 1088 Wu, X., Zou, Q., Hu, J., Tang, W., Mao, Y., Gao, L., ... Yang, Y. (2015). Intrinsic functional  
1089 connectivity patterns predict consciousness level and recovery outcome in acquired  
1090 brain injury. *Journal of Neuroscience*, 35(37), 12932–12946.  
1091 <https://doi.org/10.1523/JNEUROSCI.0415-15.2015>
- 1092 Xia, M., Wang, J., & He, Y. (2013). BrainNet Viewer: A Network Visualization Tool for  
1093 Human Brain Connectomics. *PLoS ONE*, 8: e68910.
- 1094
